# Supplementary material for: The histone variant MacroH2A regulates Ca2+ influx through TRPC3 and TRPC6 channels
Source: PubMed Central journal article supplement — Oncogenesis. 2013 Oct 28;2(10):e77–. doi: 10.1038/oncsis.2013.40 (PMC3816217; doi:10.1038/oncsis.2013.40), 2013-10-28
Supplement: oncsis201340x3.pdf [file oncsis201340x3.pdf]

**Table S1. List the genes whose expression was activated or repressed at least 1.5-fold after macroH2A1 depletion in LD611 cells.**

List of genes upregulated in macroH2A1-depleted LD611 cells

| Symbol    | GenBank        | Fold     | <i>p</i> -value |
|-----------|----------------|----------|-----------------|
| AASDHPPT  | NM_015423.2    | 1.5189   | 0.00339         |
| ABCA13    | NM_152701.2    | 1.89251  | 0.00316         |
| ABT1      | NM_013375.2    | 1.600815 | 0.00228         |
| ADAMTS6   | NM_197941.2    | 1.53032  | 0.00317         |
| ADAMTSL4  | NM_019032.3    | 1.612625 | 0.00215         |
| ALDH3B2   | NM_000695.3    | 1.75282  | 0.00144         |
| ALDOC     | NM_005165.2    | 1.88923  | 0.00174         |
| ANKRD10   | NM_017664.2    | 2.46871  | 0.01042         |
| APOBEC3B  | NM_004900.3    | 1.78384  | 0.00192         |
| ARHGEF6   | NM_004840.2    | 1.62117  | 0.00204         |
| ASS1      | NM_000050.3    | 2.00077  | 0.00068         |
| ATP6V1C1  | NM_001695.3    | 2.38991  | 0.01564         |
| C10ORF46  | NM_153810.3    | 1.97217  | 0.00062         |
| C19ORF21  | NM_173481.2    | 1.70494  | 0.004           |
| C1R       | NM_001733.4    | 1.62432  | 0.00213         |
| C1S       | NM_001734.2    | 1.780685 | 0.0014          |
| C21ORF129 | NM_152506.1    | 1.817305 | 0.00177         |
| C3        | NM_000064.1    | 1.81971  | 0.00112         |
| C3ORF23   | NM_001029839.1 | 1.593205 | 0.00256         |
| C4BPB     | NM_001017367.1 | 1.646275 | 0.00271         |
| C5ORF25   | NM_198567.1    | 1.583765 | 0.00238         |
| C9ORF58   | NM_001002260.1 | 1.62403  | 0.00235         |
| CA12      | NM_001218.3    | 2.42395  | 0.00179         |
| CA2       | NM_000067.1    | 1.73104  | 0.00126         |
| CABC1     | NM_020247.3    | 1.66998  | 0.00159         |
| CALB1     | NM_004929.2    | 1.66038  | 0.00197         |
| CBL       | NM_005188.2    | 1.95339  | 0.00463         |
| CBS       | NM_000071.1    | 1.56258  | 0.00304         |
| CD70      | NM_001252.2    | 3.52883  | 0.00012         |
| CD99L2    | NM_134445.2    | 1.6696   | 0.00215         |
| CDR2L     | NM_014603.1    | 1.841965 | 0.00087         |
| CFB       | NM_001710.4    | 2.245405 | 0.00182         |
| CITED2    | NM_006079.3    | 1.685435 | 0.00191         |
| CKB       | NM_001823.3    | 1.84329  | 0.00319         |
| CKMT1A    | NM_001015001.1 | 1.7475   | 0.00223         |
| CKMT1B    | NM_020990.3    | 1.607005 | 0.00227         |
| CLCF1     | NM_013246.2    | 1.61342  | 0.00241         |
| COBL      | NM_015198.2    | 1.8934   | 0.00072         |
| COCH      | NM_004086.1    | 1.84184  | 0.00371         |

|           |             |          |         |
|-----------|-------------|----------|---------|
| CPA4      | NM_016352.2 | 1.894235 | 0.00198 |
| CPS1      | NM_001875.2 | 1.7466   | 0.00131 |
| CPT1C     | NM_152359.1 | 1.66648  | 0.00268 |
| CR2       | NM_001877.3 | 1.77561  | 0.00279 |
| CRABP2    | NM_001878.2 | 2.9512   | 0.00036 |
| CTSC      | NM_001814.2 | 1.77114  | 0.00108 |
| CXCL5     | NM_002994.3 | 1.57807  | 0.00256 |
| CXCL6     | NM_002993.2 | 1.94407  | 0.00479 |
| CYP24A1   | NM_000782.3 | 1.582825 | 0.00239 |
| CYP4F11   | NM_021187.2 | 1.799665 | 0.00109 |
| DENND2D   | NM_024901.3 | 1.61993  | 0.00282 |
| DHCR7     | NM_001360.1 | 2.16512  | 0.0046  |
| E2F5      | NM_001951.2 | 1.55908  | 0.00308 |
| EDN1      | NM_001955.2 | 1.962725 | 0.00072 |
| EML1      | NM_004434.2 | 1.79887  | 0.00392 |
| EPDR1     | NM_017549.2 | 1.693505 | 0.00266 |
| FADS2     | NM_004265.2 | 1.61561  | 0.00252 |
| FBXO6     | NM_018438.4 | 1.543325 | 0.00296 |
| FER1L4    | NR_001442.2 | 1.59686  | 0.0028  |
| FERMT2    | NM_006832.1 | 1.936325 | 0.00426 |
| FLJ10916  | NM_018271.2 | 1.702365 | 0.00235 |
| FLJ12684  | NM_024534.4 | 2.469775 | 0.00034 |
| FSTL3     | NM_005860.1 | 1.93398  | 0.00081 |
| GABBR2    | NM_005458.5 | 1.78219  | 0.00109 |
| GADD45A   | NM_001924.2 | 1.73045  | 0.00156 |
| GAL       | NM_015973.2 | 1.6045   | 0.00232 |
| GDF15     | NM_004864.1 | 1.877265 | 0.00076 |
| GFPT2     | NM_005110.1 | 1.848415 | 0.00101 |
| GGT6      | NM_153338.1 | 1.602585 | 0.00283 |
| GPR68     | NM_003485.3 | 1.60856  | 0.00254 |
| GYG2      | NM_003918.2 | 1.734895 | 0.00361 |
| H19       | NR_002196.1 | 2.298225 | 0.0004  |
| HBE1      | NM_005330.3 | 1.845475 | 0.00351 |
| HES2      | NM_019089.3 | 1.860775 | 0.00321 |
| HSD17B6   | NM_003725.2 | 1.5266   | 0.00323 |
| HSD17B7P2 | NM_182829.1 | 1.58695  | 0.00242 |
| HSPA2     | NM_021979.2 | 1.739845 | 0.00154 |
| HSPB8     | NM_014365.2 | 1.58273  | 0.0024  |
| ID1       | NM_004508.2 | 2.286945 | 0.00147 |
| IGFL1     | NM_198541.1 | 4.92573  | 0.00183 |
| IL12RB2   | NM_001559.2 | 1.6191   | 0.00216 |
| IL1R2     | NM_173343.1 | 1.75867  | 0.00111 |
| IL1RN     | NM_173842.1 | 2.66951  | 0.00014 |
| IL20RB    | NM_144717.2 | 1.541115 | 0.00315 |

|          |                |          |         |
|----------|----------------|----------|---------|
| ILDR1    | NM_175924.2    | 1.705065 | 0.00186 |
| KIAA1191 | NM_020444.3    | 2.00908  | 0.00052 |
| KIAA1737 | NM_033426.2    | 1.931645 | 0.00222 |
| KLK10    | NM_145888.1    | 2.241995 | 0.00177 |
| KLK11    | NM_006853.2    | 1.98211  | 0.00297 |
| KLK6     | NM_002774.3    | 1.958315 | 0.00058 |
| KLK7     | NM_139277.1    | 1.807535 | 0.00641 |
| KRT13    | NM_002274.2    | 1.725855 | 0.00316 |
| KRT17    | NM_000422.1    | 1.74747  | 0.0052  |
| KRT34    | NM_021013.3    | 2.999825 | 0.00549 |
| KRT6B    | NM_005555.2    | 1.882135 | 0.00074 |
| KRT8     | NM_002273.2    | 1.721485 | 0.00169 |
| KTELC1   | NM_152305.1    | 1.69024  | 0.00164 |
| LAMA2    | NM_000426.2    | 1.62032  | 0.00201 |
| LAYN     | NM_178834.2    | 1.721265 | 0.00201 |
| LIN28B   | NM_001004317.2 | 2.686045 | 0.00248 |
| LRRC61   | NM_023942.1    | 1.85412  | 0.00238 |
| MARCO    | NM_006770.3    | 1.59552  | 0.00225 |
| MINA     | NM_153182.1    | 1.60547  | 0.0033  |
| MKX      | NM_173576.1    | 1.67449  | 0.00292 |
| MLLT6    | NM_005937.2    | 1.58076  | 0.00279 |
| MMP7     | NM_002423.3    | 2.61264  | 0.00018 |
| MRAS     | NM_012219.2    | 1.598395 | 0.00242 |
| MRS2     | NM_020662.1    | 1.60961  | 0.00216 |
| MUC1     | NM_001044390.1 | 1.790265 | 0.00149 |
| MUC16    | NM_024690.2    | 1.5942   | 0.00283 |
| MUC20    | NM_152673.1    | 1.6958   | 0.00264 |
| MYEOV    | NM_138768.2    | 2.90523  | 0.00041 |
| NFE2     | NM_006163.1    | 1.88919  | 0.00142 |
| NOV      | NM_002514.2    | 1.639855 | 0.00278 |
| NPL      | NM_030769.1    | 1.638405 | 0.00185 |
| OLR1     | NM_002543.2    | 1.96041  | 0.00076 |
| PCDH19   | NM_020766.1    | 2.144875 | 0.00499 |
| PCOLCE2  | NM_013363.2    | 1.78699  | 0.00128 |
| PFKFB4   | NM_004567.2    | 1.56916  | 0.00258 |
| PHGDH    | NM_006623.2    | 1.70643  | 0.0018  |
| PLEKHA3  | NM_019091.3    | 1.58004  | 0.00253 |
| PODXL    | NM_001018111.1 | 1.7292   | 0.00127 |
| PPP2R2A  | NM_002717.2    | 1.679315 | 0.0022  |
| PROS1    | NM_000313.1    | 1.96693  | 0.00077 |
| PRTFDC1  | NM_020200.5    | 1.925875 | 0.00096 |
| PSAT1    | NM_021154.3    | 1.817135 | 0.00097 |
| PTGER2   | NM_000956.2    | 2.385095 | 0.00848 |
| QPRT     | NM_014298.3    | 1.95075  | 0.00128 |

|           |                |          |         |
|-----------|----------------|----------|---------|
| RAB11FIP5 | NM_015470.1    | 1.624565 | 0.00199 |
| RAB17     | NM_022449.1    | 1.5603   | 0.00281 |
| REEP1     | NM_022912.1    | 2.716075 | 0.00402 |
| REXO1     | NM_020695.2    | 1.59857  | 0.00242 |
| RRP9      | NM_004704.3    | 1.56457  | 0.00315 |
| RSL1D1    | NM_015659.1    | 1.55549  | 0.00301 |
| RYK       | NM_002958.3    | 1.73283  | 0.00214 |
| SALL4     | NM_020436.2    | 1.992475 | 0.0008  |
| SC4MOL    | NM_006745.3    | 1.97675  | 0.00598 |
| SEC23B    | NM_032985.4    | 2.19484  | 0.00069 |
| SERP2     | NM_001010897.1 | 1.733225 | 0.00123 |
| SERPINB13 | NM_012397.2    | 1.78277  | 0.00225 |
| SERPINB4  | NM_002974.1    | 2.135895 | 0.0078  |
| SH2D4A    | NM_022071.2    | 1.614235 | 0.00285 |
| SLC13A5   | NM_177550.2    | 1.661425 | 0.00179 |
| SLC27A2   | NM_003645.2    | 2.370155 | 0.00105 |
| SLC35B3   | NM_015948.2    | 2.68784  | 0.00037 |
| SLC4A11   | NM_032034.1    | 1.71226  | 0.00206 |
| SLC6A9    | NM_006934.2    | 1.66508  | 0.00216 |
| SLC9A3R1  | NM_004252.1    | 1.88271  | 0.00126 |
| SLCO2A1   | NM_005630.1    | 2.61944  | 0.00169 |
| SMPDL3B   | NM_001009568.1 | 1.55744  | 0.00281 |
| SNAPC1    | NM_003082.2    | 1.925735 | 0.00091 |
| SNCG      | NM_003087.1    | 1.61309  | 0.00271 |
| SPRR2A    | NM_005988.2    | 2.09689  | 0.0004  |
| STOM      | NM_004099.4    | 1.708225 | 0.00167 |
| SUSD3     | NM_145006.2    | 1.812205 | 0.00102 |
| TAGLN     | NM_003186.3    | 2.243635 | 0.0006  |
| TASP1     | NM_017714.1    | 1.64468  | 0.00199 |
| TCEA3     | NM_003196.1    | 2.2269   | 0.00042 |
| TCF12     | NM_207036.1    | 2.151785 | 0.00057 |
| TCN1      | NM_001062.2    | 1.85083  | 0.00101 |
| TGM1      | NM_000359.1    | 2.402245 | 0.00027 |
| TRIM17    | NM_016102.2    | 1.542155 | 0.00301 |
| TRPC3     | NM_003305.1    | 1.5889   | 0.00242 |
| TRPC6     | NM_004621.3    | 1.52381  | 0.00337 |
| TUFT1     | NM_020127.1    | 1.96702  | 0.00059 |
| UGT3A2    | NM_174914.2    | 1.964115 | 0.00063 |
| VAPA      | NM_003574.4    | 1.914205 | 0.00072 |
| VNN1      | NM_004666.1    | 1.588905 | 0.00261 |
| VPS33A    | NM_022916.3    | 1.58352  | 0.00248 |
| XK        | NM_021083.2    | 1.802265 | 0.00338 |

List of genes downregulated in macroH2A1-depleted LD611 cells

| Symbol   | GenBank        | Fold      | <i>p</i> -value |
|----------|----------------|-----------|-----------------|
| ANTXR2   | NM_058172.3    | -2.336345 | 0.00097         |
| ANXA10   | NM_007193.3    | -2.12519  | 0.00462         |
| C1QTNF6  | NM_031910.3    | -2.113915 | 0.00097         |
| C3ORF21  | NM_152531.3    | -1.920105 | 0.00229         |
| C9ORF140 | NM_178448.2    | -1.530415 | 0.00316         |
| CAMK2N1  | NM_018584.4    | -2.11871  | 0.0073          |
| CCND2    | NM_001759.2    | -4.354395 | 0.0000353       |
| COL4A1   | NM_001845.3    | -2.170945 | 0.00199         |
| CTDSPL   | NM_005808.2    | -1.5352   | 0.00311         |
| DAZAP2   | NM_014764.2    | -1.99387  | 0.00121         |
| ESM1     | NM_007036.3    | -2.58     | 0.002           |
| F11R     | NM_144504.1    | -1.899995 | 0.00438         |
| FAM129A  | NM_022083.1    | -1.718525 | 0.00313         |
| FAM20C   | NM_020223.1    | -1.839975 | 0.00112         |
| FOXQ1    | NM_033260.2    | -2.39688  | 0.00091         |
| FST      | NM_013409.1    | -1.71775  | 0.00166         |
| FSTL1    | NM_007085.3    | -2.24806  | 0.00083         |
| H2AFY    | NM_004893.2    | -9.58871  | 0.00012         |
| HAS3     | NM_005329.2    | -1.62288  | 0.00318         |
| IL1RAP   | NM_134470.2    | -1.589395 | 0.00256         |
| KCTD9    | NM_017634.2    | -1.958915 | 0.00198         |
| KIAA1199 | NM_018689.1    | -2.03552  | 0.00475         |
| LFNG     | NM_002304.1    | -1.952605 | 0.00083         |
| LHFP     | NM_005780.1    | -2.57646  | 0.00368         |
| LPAR1    | NM_001401.3    | -2.697505 | 0.00014         |
| MALL     | NM_005434.3    | -1.96883  | 0.00057         |
| MORF4L1  | NM_006791.2    | -1.946205 | 0.00086         |
| MYADM    | NM_001020820.1 | -1.643725 | 0.00179         |
| NGFR     | NM_002507.1    | -1.539775 | 0.00318         |
| PCDH7    | NM_002589.2    | -1.639275 | 0.00182         |
| PPIC     | NM_000943.4    | -2.7832   | 0.00057         |
| PRIC285  | NM_033405.2    | -1.68295  | 0.00182         |
| PTPRK    | NM_002844.2    | -1.749525 | 0.00501         |
| RCC2     | NM_018715.1    | -1.920415 | 0.00076         |
| SH3GL2   | NM_003026.1    | -2.730415 | 0.00013         |
| SH3PXD2A | NM_014631.2    | -2.45112  | 0.02035         |
| SLC16A3  | NM_004207.2    | -2.33979  | 0.01835         |
| SLC20A2  | NM_006749.3    | -1.82496  | 0.00615         |
| SPARC    | NM_003118.2    | -2.42152  | 0.00028         |
| TMEM200A | NM_052913.2    | -2.660685 | 0.01905         |
| TSPAN4   | NM_001025238.1 | -2.166585 | 0.00215         |
