# Supplementary material for: The histone variant MacroH2A regulates Ca2+ influx through TRPC3 and TRPC6 channels
Source: PubMed Central journal article supplement — Oncogenesis. 2013 Oct 28;2(10):e77–. doi: 10.1038/oncsis.2013.40 (PMC3816217; doi:10.1038/oncsis.2013.40), 2013-10-28
Supplement: oncsis201340x5.pdf [file oncsis201340x5.pdf]

**Table S3.** List the oligonucleotide primers used for qRT-PCR and ChIP analyses.

## qRT-PCR primers used in this study

| Gene name | Forward primer (5'-3')  | Reverse primer (5'-3')   |
|-----------|-------------------------|--------------------------|
| MacroH2A1 | tgggaagaagaactccacca    | ccgtcccttcttgtgtctc      |
| MacroH2A2 | gttcagctagggcaggtgtc    | caactgccagcaagatgtgt     |
| C1R       | atagaggggaaccaggtgct    | tggtggtgtaacggaagtca     |
| C1S       | aagagcgttttacggggttt    | aatctcccaatcagtgcat      |
| CALB1     | gacggaagtggftacctgga    | tgccatactgatccacaaa      |
| CBL       | gttccctcaagtgtctctgc    | aacagaatatggccggctctg    |
| EML1      | ctcactgggaggtggtttgt    | cgtgtacttctcccgttgt      |
| EPDR1     | agattgaccaagccaccaag    | gatgccaatccaggtttcat     |
| MMP7      | ggagtgccagatgttgagaatac | cgatcctgtaggtgaccactttgg |
| PCDH19    | gaacatcatcgcgctgtcta    | tcgacagtctcttgccttt      |
| PROS1     | cctagtgtctcccgtctcag    | tttccgggtcattttcaaag     |
| TGM1      | actacggccagttgaccac     | tcgggagtaatcaccagacc     |
| HDAC1     | ggaaatctatgcacctaca     | aacaggccatcgaatactgg     |
| HDAC2     | ctgttaattgggctggagga    | aattcaaggatggcaagcac     |
| TRPC1     | gatgcattccatcctacact    | tacacagtcttctgtctct      |
| TRPC2     | tccattggcaagatgattga    | atgagcatgttgagcagcac     |
| TRPC3     | caagaatgactatcggaagc    | gccacaaactttttgacttc     |
| TRPC4     | ggacttcaggactacatcca    | acgcagagaactgaagatgt     |
| TRPC5     | ccaccagctatcagataagg    | cgaacaagccacttatacc      |
| TRPC6     | gctcatcctaaactgccaacagc | gtctgtgtcgtaaaccagaaagc  |
| TRPC7     | catagcctattggattgtctc   | ggtagtctgtgaaggtttcg     |
| GAPDH     | ggcctccaaggagtaagacc    | aggggagattcagtggtgtg     |
| ACTB      | tcaccgagcgcggct         | taatgtcacgcacgatttccc    |

## ChIP primers used in this study

| Gene name | Forward primer (5'-3')  | Reverse primer (5'-3') | Position relative to TSS |
|-----------|-------------------------|------------------------|--------------------------|
| TRPC3-A   | accctgttggaggtcagatg    | atggcagcctgaatgaagac   | -4075 to -3842           |
| TRPC3-B   | cagccaaacacagcacattt    | acaggaagggggactttcac   | -2268 to -2038           |
| TRPC3-C   | ggtttcagtggttagtgtg     | tcctccatggacctaataca   | -102 to +13              |
| TRPC3-D   | tcccatcccctttccataca    | tgggacaaaatgagcattga   | +1930 to +1991           |
| TRPC3-E   | gagtgtcttgagtcccagtcg   | ccagacttctgggttcaaa    | +3879 to +4099           |
| TRPC6-A   | acgtggaaaattgagggtcca   | atggactgagctgcttttgg   | -4256 to -4130           |
| TRPC6-B   | tggccgaaataaaaatccag    | cccagaaggaataaggtggtg  | -2058 to -1945           |
| TRPC6-C   | accgectctgaaagttgtggcta | ttcatccccgcactctcctgc  | -77 to +30               |
| TRPC6-D   | tcccaggttctcagctcta     | cctgacacagcccatcta     | +1600 to +1698           |
| TRPC6-E   | tgtggtgcccctgtgagtta    | tccagtctctgcctcatct    | +4056 to +4167           |

| Gene name | Forward primer (5'-3')    | Reverse primer (5'-3') | Position relative to TSS |
|-----------|---------------------------|------------------------|--------------------------|
| TRPC1-A   | acacagtgaaccccgtctc       | cttgctctgcaccaggat     | -4390 to -4233           |
| TRPC1-B   | gcagtggctcatgcttgtaa      | gtttctccctgttggtcagg   | -2010 to -1930           |
| TRPC1-C   | cagaggatgacgtgaggaca      | cgagagatctgtgggagagg   | -375 to -248             |
| TRPC1-D   | tcagtggaatatggttgagca     | cccaaagccaagtctctcat   | +1967 to +2061           |
| TRPC1-E   | atgattcagtcctgccaac       | gctgagcccactgataaagg   | +3684 to +3834           |
| TRPC4-A   | tgagaggaaaaagatattaggagca | gctattccccatttggtt     | -4147 to -3931           |
| TRPC4-B   | accacgggttgatctcaaag      | aacaaggaggaggagactgt   | -2144 to -1984           |
| TRPC4-C   | tcagcagcgactaagggaat      | cgaggcgacatcctctttac   | +87 to +224              |
| TRPC4-D   | ccatggagaactacagccatc     | tgatagacacagccatccaaa  | +1890 to +2079           |
| TRPC4-E   | gggaaggcaggattgaagt       | catgatggggacagttggtt   | +3988 to +4200           |
